# Supplementary material for: Application of Viscose-Based Porous Carbon Fibers in Food Processing—Malathion and Chlorpyrifos Removal
Source: MDPI journal article supplement (doi:10.3390/foods12122362), 2023-06-13
Supplement: s1 [file s1]

Article

# Application of Viscose-Based Porous Carbon Fibers in Food Processing—Malathion and Chlorpyrifos Removal

Tamara Tasić <sup>1</sup>, Vedran Milanković <sup>1</sup>, Katarina Batalović <sup>1</sup>, Stefan Breitenbach <sup>2,3</sup>, Christoph Unterweger <sup>2</sup>, Christian Fürst <sup>2</sup>, Igor A. Pašti <sup>4,\*</sup> and Tamara Lazarević-Pašti <sup>1</sup>

- <sup>1</sup> VINČA Institute of Nuclear Sciences—National Institute of the Republic of Serbia, University of Belgrade, Mike Petrovica Alasa 12–14, 11000 Belgrade, Serbia; tamara.tasic@vin.bg.ac.rs (T.T.); vedran.milankovic@vin.bg.ac.rs (V.M.); kciric@vin.bg.ac.rs (K.B.); tamara@vin.bg.ac.rs (T.L.-P.)
- <sup>2</sup> Wood K Plus—Kompetenzzentrum Holz GmbH, Altenberger Strasse 69, 4040 Linz, Austria; s.breitenbach@wood-kplus.at (S.B.); c.unterweger@wood-kplus.at (C.U.); c.fuerst@wood-kplus.at (C.F.)
- <sup>3</sup> Institute of Chemical Technology of Inorganic Materials (TIM), Johannes Kepler University Linz, Altenberger Strasse 69, 4040 Linz, Austria
- <sup>4</sup> Faculty of Physical Chemistry, University of Belgrade, Studentski Trg 12–16, 11158 Belgrade, Serbia
- \* Correspondence: igor@ffh.bg.ac.rs

**Table S1.** Kinetics parameters for malathion ( $5 \times 10^{-4}$  mol dm<sup>-3</sup>) and chlorpyrifos ( $5 \times 10^{-4}$  mol dm<sup>-3</sup>) for pseudo-first-order kinetics, adsorbent dose 1 mg ml<sup>-1</sup>.

| Material | Pseudo-first order kinetics |              |                            |              |           |              |           |              |
|----------|-----------------------------|--------------|----------------------------|--------------|-----------|--------------|-----------|--------------|
|          | $q_e$ (mg g <sup>-1</sup> ) |              | $k_2$ (min <sup>-1</sup> ) |              | $\chi^2$  |              | $R^2$     |              |
|          | malathion                   | chlorpyrifos | malathion                  | chlorpyrifos | malathion | chlorpyrifos | malathion | chlorpyrifos |
| Run1     | 159.772                     | 175.040      | $7.28 \times 10^9$         | 7242.4       | 13.978    | 0.029        | 0.996     | 0.999        |
| Run2     | 12.657                      | 167.674      | 2.025                      | 164.902      | 11.704    | 0.015        | 0.635     | 0.999        |
| Run3     | 41.425                      | 170.879      | 0.036                      | 145.493      | 88.377    | 0.258        | 0.601     | 0.999        |
| Run5     | 5.756                       | 167.464      | 1.650                      | 135.333      | 4.276     | 0.445        | 0.476     | 0.999        |
| Run6     | 20.777                      | 166.957      | 2.950                      | 84.953       | 0.746     | 1.806        | 0.988     | 0.999        |
| Run7     | 12.688                      | 168.008      | $1.20 \times 10^5$         | 3.874        | 4.488     | 5.013        | 0.832     | 0.999        |
| Run8     | 152.754                     | 174.456      | 2.128                      | 57473        | 66.580    | 2.392        | 0.980     | 0.999        |
| Run9     | 12.448                      | 169.419      | 1.124                      | 117.977      | 6.558     | 0.506        | 0.760     | 0.999        |
| Run10    | 15.859                      | 167.294      | 0.015                      | 139.604      | 14.468    | 0.168        | 0.732     | 0.999        |
| Run12    | 14.258                      | 167.828      | 0.015                      | 112.966      | 10.543    | 0.774        | 0.750     | 0.999        |
| Run13    | 22.393                      | 169.189      | 0.014                      | 138.148      | 23.982    | 0.345        | 0.764     | 0.999        |
| Run15    | 10.691                      | 168.563      | 0.013                      | 95.282       | 4.604     | 0.945        | 0.790     | 0.999        |
| Run16    | 156.692                     | 171.865      | 0.181                      | 49372        | 127.362   | 16.623       | 0.969     | 0.997        |
| Run17    | 16.648                      | 166.658      | 0.014                      | 111.398      | 13.972    | 0.495        | 0.755     | 0.999        |

**Table S2.** Kinetics parameters for malathion ( $5 \times 10^{-4}$  mol dm $^{-3}$ ) and chlorpyrifos ( $5 \times 10^{-4}$  mol dm $^{-3}$ ) for pseudo-second-order kinetics, adsorbent dose 1 mg ml $^{-1}$ .

| Materials | Pseudo-Second Order Kinetics |              |                       |              |           |              |           |              |
|-----------|------------------------------|--------------|-----------------------|--------------|-----------|--------------|-----------|--------------|
|           | $q_e$ (mg g $^{-1}$ )        |              | $k_1$ (min $^{-1}$ )  |              | $\chi^2$  |              | $R^2$     |              |
|           | malathion                    | chlorpyrifos | malathion             | chlorpyrifos | malathion | chlorpyrifos | malathion | chlorpyrifos |
| Run1      | 161.395                      | 175.179      | 0.134                 | 2.390        | 6.483     | 0.003        | 0.998     | 0.999        |
| Run2      | 13.114                       | 167.734      | 0.246                 | 4.570        | 10.988    | 0.007        | 0.657     | 0.999        |
| Run3      | 40.922                       | 171.105      | 0.002                 | 1.190        | 74.347    | 0.138        | 0.664     | 0.999        |
| Run5      | 6.189                        | 167.756      | 0.238                 | 0.918        | 3.881     | 0.245        | 0.525     | 0.999        |
| Run6      | 20.957                       | 167.605      | 0.586                 | 0.412        | 0.584     | 0.826        | 0.990     | 0.999        |
| Run7      | 12.689                       | 168.540      | $2.68 \times 10^{-4}$ | 0.215        | 4.488     | 3.967        | 0.832     | 0.999        |
| Run8      | 155.292                      | 175.760      | 0.036                 | 0.252        | 41.154    | 0.108        | 0.988     | 0.999        |
| Run9      | 13.453                       | 169.810      | 0.079                 | 0.688        | 4.513     | 0.149        | 0.835     | 0.999        |
| Run10     | 16.782                       | 167.532      | $9.94 \times 10^{-4}$ | 1.130        | 17.000    | 0.035        | 0.685     | 0.999        |
| Run12     | 15.111                       | 168.267      | 0.001                 | 0.610        | 12.360    | 0.323        | 0.707     | 0.999        |
| Run13     | 23.766                       | 169.459      | $6.34 \times 10^{-4}$ | 0.994        | 28.060    | 0.174        | 0.723     | 0.999        |
| Run15     | 11.380                       | 175.179      | 0.001                 | 0.492        | 5.361     | 0.256        | 0.756     | 0.999        |
| Run16     | 165.618                      | 167.734      | 0.002                 | 0.122        | 121.284   | 7.551        | 0.970     | 0.998        |
| Run17     | 17.655                       | 171.105      | $8.79 \times 10^{-4}$ | 0.629        | 16.370    | 0.070        | 0.713     | 0.999        |

**Table S3.** Parameters for malathion and chlorpyrifos adsorption using Freundlich adsorption isotherm, adsorbent dose 1 mg ml $^{-1}$ .

| Materials | Freundlich isotherm                     |              |           |              |                       |              |           |              |
|-----------|-----------------------------------------|--------------|-----------|--------------|-----------------------|--------------|-----------|--------------|
|           | $K_F$ ((dm $^3$ mg $^{-1}$ ) $^{1/n}$ ) |              | $n$       |              | $\chi^2$              |              | $R^2$     |              |
|           | malathion                               | chlorpyrifos | malathion | chlorpyrifos | malathion             | chlorpyrifos | malathion | chlorpyrifos |
| Run1      | 131.634                                 | 427.447      | 1.222     | 1.327        | 1.200                 | 1.404        | 0.999     | 0.992        |
| Run2      | 0.627                                   | 10.639       | 1.526     | 1.803        | 0.009                 | 1.772        | 0.999     | 0.985        |
| Run3      | 16.647                                  | 25.087       | 5.441     | 3.113        | 3.735                 | 12.394       | 0.986     | 0.917        |
| Run5      | 0.342                                   | 9.087        | 1.613     | 1.659        | 0.085                 | 4.773        | 0.994     | 0.958        |
| Run6      | 0.098                                   | 11.325       | 0.923     | 1.902        | 0.145                 | 2.517        | 0.999     | 0.978        |
| Run7      | 0.185                                   | 9.547        | 1.204     | 1.655        | 0.174                 | 0.549        | 0.996     | 0.995        |
| Run8      | 60.607                                  | 284.974      | 1.487     | 1.452        | 6.100                 | 15.588       | 0.999     | 0.998        |
| Run9      | 1.343                                   | 11.204       | 2.068     | 1.099        | 1.355                 | 0.058        | 0.976     | 0.999        |
| Run10     | 1.072                                   | 13.006       | 1.893     | 2.095        | 0.094                 | 14.413       | 0.998     | 0.881        |
| Run12     | 0.855                                   | 10.114       | 1.846     | 1.573        | 0.025                 | 0.814        | 0.999     | 0.993        |
| Run13     | 0.740                                   | 10.757       | 1.516     | 1.676        | $6.49 \times 10^{-4}$ | 0.157        | 0.999     | 0.999        |
| Run15     | 1.324                                   | 10.355       | 2.659     | 1.566        | 0.606                 | 0.193        | 0.964     | 0.998        |
| Run16     | 44.814                                  | 520.949      | 1.282     | 1.252        | 11.452                | 0.597        | 0.998     | 0.997        |
| Run17     | 0.857                                   | 11.492       | 1.750     | 1.833        | 0.126                 | 2.239        | 0.998     | 0.981        |

**Table S4.** Parameters for malathion and chlorpyrifos adsorption using Langmuir adsorption isotherm, adsorbent dose 1 mg mL<sup>-1</sup>.

| Materials | Langmuir isotherm                         |                       |                                 |                      |           |              |           |              |
|-----------|-------------------------------------------|-----------------------|---------------------------------|----------------------|-----------|--------------|-----------|--------------|
|           | $K_L$ (dm <sup>3</sup> mg <sup>-1</sup> ) |                       | $q_{max}$ (mg g <sup>-1</sup> ) |                      | $\chi^2$  |              | $R^2$     |              |
|           | malathion                                 | chlorpyrifos          | malathion                       | chlorpyrifos         | malathion | chlorpyrifos | malathion | chlorpyrifos |
| Run1      | 0.057                                     | 9.79×10 <sup>-4</sup> | 2377.669                        | 1.04×10 <sup>6</sup> | 51.800    | 12.155       | 0.991     | 0.930        |
| Run2      | 0.011                                     | 0.281                 | 26.697                          | 45.049               | 0.177     | 0.315        | 0.997     | 0.997        |
| Run3      | 0.442                                     | 5.038                 | 38.672                          | 33.488               | 15.938    | 5.418        | 0.939     | 0.964        |
| Run5      | 0.011                                     | 0.229                 | 12.362                          | 45.597               | 0.231     | 6.594        | 0.985     | 0.942        |
| Run6      | 1.63×10 <sup>-5</sup>                     | 0.271                 | 9060.294                        | 46.504               | 0.291     | 3.446        | 0.998     | 0.971        |
| Run7      | 0.003                                     | 0.211                 | 36.070                          | 49.891               | 0.226     | 0.659        | 0.994     | 0.994        |
| Run8      | 0.402                                     | 0.002                 | 254.409                         | 1.48×10 <sup>5</sup> | 1.241     | 249.801      | 0.999     | 0.960        |
| Run9      | 0.033                                     | 0.048                 | 18.150                          | 240.797              | 0.042     | 0.067        | 0.999     | 0.999        |
| Run10     | 0.022                                     | 0.503                 | 19.621                          | 39.361               | 0.130     | 4.028        | 0.998     | 0.967        |
| Run12     | 0.020                                     | 0.208                 | 17.308                          | 54.840               | 0.140     | 1.384        | 0.997     | 0.989        |
| Run13     | 0.011                                     | 0.232                 | 31.698                          | 52.202               | 0.160     | 1.449        | 0.998     | 0.988        |
| Run15     | 0.054                                     | 0.196                 | 9.797                           | 58.122               | 0.047     | 0.632        | 0.997     | 0.995        |
| Run16     | 0.131                                     | 9.79×10 <sup>-4</sup> | 398.735                         | 1.10×10 <sup>6</sup> | 25.103    | 6.445        | 0.995     | 0.963        |
| Run17     | 0.018                                     | 0.297                 | 20.502                          | 46.399               | 0.034     | 1.386        | 0.999     | 0.988        |

**Table S5.** Parameters for malathion and chlorpyrifos adsorption using Temkin adsorption isotherm, adsorbent dose 1 mg mL<sup>-1</sup>.

| Materials | Temkin isotherm                           |              |                                                 |              |           |              |           |              |
|-----------|-------------------------------------------|--------------|-------------------------------------------------|--------------|-----------|--------------|-----------|--------------|
|           | $K_T$ (dm <sup>3</sup> mg <sup>-1</sup> ) |              | $b_T$ (J g mol <sup>-1</sup> mg <sup>-1</sup> ) |              | $\chi^2$  |              | $R^2$     |              |
|           | malathion                                 | chlorpyrifos | malathion                                       | chlorpyrifos | malathion | chlorpyrifos | malathion | chlorpyrifos |
| Run1      | 100.296                                   | 479.958      | 100.387                                         | 224.862      | 2667.335  | 14.439       | 0.520     | 0.917        |
| Run2      | 0.738                                     | 6.314        | 793.351                                         | 341.343      | 21.023    | 6.162        | 0.711     | 0.947        |
| Run3      | 19.194                                    | 84.807       | 481.118                                         | 412.619      | 1.381     | 1.044        | 0.995     | 0.993        |
| Run5      | 0.815                                     | 5.424        | 1741.088                                        | 346.078      | 5.074     | 10.864       | 0.670     | 0.904        |
| Run6      | 0.471                                     | 12.283       | 584.517                                         | 411.541      | 62.868    | 13.147       | 0.538     | 0.888        |
| Run7      | 0.616                                     | 5.501        | 1091.750                                        | 336.207      | 17.146    | 7.861        | 0.577     | 0.932        |
| Run8      | 78.871                                    | 114.082      | 122.849                                         | 62.323       | 2646.405  | 750.152      | 0.505     | 0.880        |
| Run9      | 0.754                                     | 4.578        | 817.788                                         | 237.338      | 3.642     | 18.069       | 0.935     | 0.875        |
| Run10     | 0.914                                     | 5.887        | 885.685                                         | 303.901      | 10.140    | 4.171        | 0.820     | 0.966        |
| Run12     | 0.868                                     | 5.658        | 1026.504                                        | 318.366      | 8.288     | 9.401        | 0.801     | 0.923        |
| Run13     | 0.741                                     | 8.147        | 664.411                                         | 356.209      | 29.197    | 11.131       | 0.719     | 0.908        |
| Run15     | 1.345                                     | 6.471        | 1565.484                                        | 328.428      | 0.500     | 11.371       | 0.970     | 0.908        |
| Run16     | 39.979                                    | 553.185      | 112.639                                         | 235.892      | 2561.640  | 20.346       | 0.516     | 0.884        |
| Run17     | 0.720                                     | 8.324        | 848.424                                         | 357.100      | 10.500    | 9.199        | 0.817     | 0.923        |

**Table S6.** Parameters for malathion and chlorpyrifos adsorption using Dubinin-Radushkevich adsorption isotherm, adsorbent dose 1 mg mL<sup>-1</sup> (MLT – malathion, CHP – chlorpyrifos).

| Materials | Dubinin-Radushkevich isotherm  |         |                                              |                       |                            |          |          |        |       |       |
|-----------|--------------------------------|---------|----------------------------------------------|-----------------------|----------------------------|----------|----------|--------|-------|-------|
|           | $q_{DR}$ (mg g <sup>-1</sup> ) |         | $K_{DR}$ (mol <sup>2</sup> J <sup>-2</sup> ) |                       | $E$ (J mol <sup>-1</sup> ) |          | $\chi^2$ |        | $R^2$ |       |
|           | MLT                            | CHP     | MLT                                          | CHP                   | MLT                        | CHP      | MLT      | CHP    | MLT   | CHP   |
| Run1      | 191.450                        | 101.691 | 7.98×10 <sup>-8</sup>                        | 1.56×10 <sup>-8</sup> | 2503.479                   | 5663.389 | 70.443   | 0.184  | 0.987 | 0.999 |
| Run2      | 16.849                         | 30.901  | 4.89×10 <sup>-5</sup>                        | 6.87×10 <sup>-7</sup> | 101.124                    | 853.065  | 0.488    | 6.428  | 0.993 | 0.945 |
| Run3      | 33.577                         | 30.522  | 3.01×10 <sup>-7</sup>                        | 2.73×10 <sup>-8</sup> | 1288.197                   | 4276.813 | 46.405   | 9.068  | 0.824 | 0.940 |
| Run5      | 7.999                          | 28.013  | 5.89×10 <sup>-5</sup>                        | 6.39×10 <sup>-7</sup> | 92.167                     | 884.642  | 0.383    | 16.929 | 0.975 | 0.850 |
| Run6      | 21.903                         | 32.334  | 9.57×10 <sup>-5</sup>                        | 7.71×10 <sup>-7</sup> | 72.288                     | 805.232  | 0.242    | 5.795  | 0.998 | 0.950 |
| Run7      | 12.365                         | 30.578  | 7.74×10 <sup>-5</sup>                        | 7.86×10 <sup>-7</sup> | 80.382                     | 797.580  | 0.359    | 8.619  | 0.991 | 0.925 |
| Run8      | 166.705                        | 216.352 | 1.40×10 <sup>-7</sup>                        | 2.86×10 <sup>-8</sup> | 1886.996                   | 4183.393 | 45.001   | 47.771 | 0.992 | 0.992 |
| Run9      | 15.175                         | 41.935  | 2.61×10 <sup>-5</sup>                        | 6.27×10 <sup>-7</sup> | 138.421                    | 892.970  | 0.223    | 6.249  | 0.996 | 0.957 |
| Run10     | 15.246                         | 31.160  | 3.47×10 <sup>-5</sup>                        | 4.10×10 <sup>-7</sup> | 120.121                    | 1104.703 | 0.556    | 6.276  | 0.990 | 0.948 |
| Run12     | 13.139                         | 31.323  | 3.92×10 <sup>-5</sup>                        | 6.44×10 <sup>-7</sup> | 112.891                    | 880.803  | 0.482    | 10.729 | 0.988 | 0.912 |
| Run13     | 19.999                         | 31.590  | 4.54×10 <sup>-5</sup>                        | 6.42×10 <sup>-7</sup> | 104.925                    | 882.395  | 0.528    | 9.412  | 0.995 | 0.923 |
| Run15     | 8.811                          | 33.012  | 2.27×10 <sup>-5</sup>                        | 7.24×10 <sup>-7</sup> | 148.264                    | 830.927  | 0.477    | 7.540  | 0.971 | 0.939 |
| Run16     | 171.739                        | 113.167 | 3.59×10 <sup>-7</sup>                        | 1.65×10 <sup>-8</sup> | 1180.622                   | 5498.127 | 132.980  | 0.893  | 0.975 | 0.995 |
| Run17     | 15.164                         | 32.253  | 3.91×10 <sup>-5</sup>                        | 6.54×10 <sup>-7</sup> | 113.139                    | 874.537  | 0.332    | 5.665  | 0.994 | 0.953 |

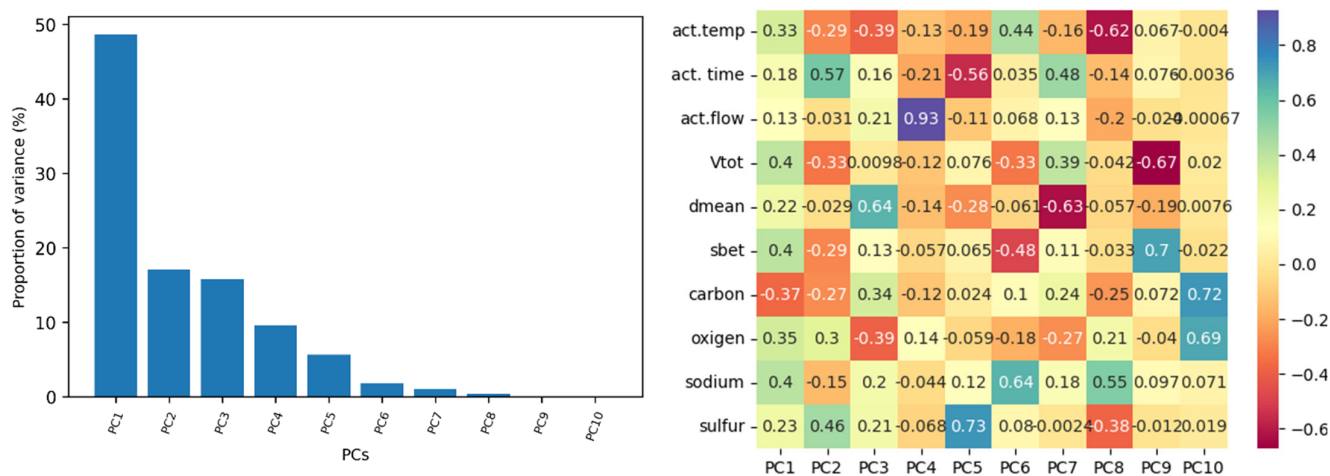**Figure S1.** PC variance proportion (left) and heatmap plot of input feature contributions in the PCs (right) for the case of 10 input variables.

**Table S7.** Adsorptive removal of malathion and chlorpyrifos in the mixture ( $5 \times 10^{-5}$  mol dm $^{-3}$  of each pesticide, 30 min equilibration time, 25 °C, adsorbent dose 1 mg ml $^{-1}$ ) given as pesticide uptake.

| Adsorbent | Malathion uptake (%) | Chlorpyrifos uptake (%) |
|-----------|----------------------|-------------------------|
| Run1      | 100                  | 100                     |
| Run2      | 0                    | 88.00                   |
| Run3      | 19.29                | 96.90                   |
| Run5      | 0                    | 86.24                   |
| Run6      | 0                    | 87.49                   |
| Run7      | 0                    | 85.80                   |
| Run8      | 100                  | 100                     |
| Run9      | 0                    | 89.22                   |
| Run10     | 0                    | 87.74                   |
| Run12     | 0                    | 87.94                   |
| Run13     | 0                    | 88.73                   |
| Run15     | 0                    | 87.98                   |
| Run16     | 99.10                | 100                     |
| Run17     | 0                    | 86.64                   |
